1 **Title**

2 *De novo* assembly and annotation of the eastern fence lizard (*Sceloporus*  
3 *undulatus*) transcriptome

4

5 **Authors**

6 Mariana B. Grizante<sup>1</sup>, Marc Tollis<sup>1,2</sup>, Juan J. Rodriguez<sup>1</sup>, Ofir Levy<sup>1</sup>, Michael J.  
7 Angilletta Jr.<sup>1</sup>, Kenro Kusumi<sup>1</sup>

8

9 **\*Corresponding authors**

10 Mariana Grizante: [mari.grizante@gmail.com](mailto:mari.grizante@gmail.com)

11 Kenro Kusumi: [Kenro.Kusumi@asu.edu](mailto:Kenro.Kusumi@asu.edu)

12

13 **Authors' emails**

14 mari.grizante@gmail.com, mtollis@asu.edu, j.rodriguez1214@gmail.com,

15 levyofi@gmail.com, ma@asu.edu, Kenro.Kusumi@asu.edu

16

17 **Affiliations**

18 <sup>1</sup>School of Life Sciences, Arizona State University, PO Box 874501, Tempe, AZ  
19 85287, USA.

20 <sup>2</sup>Biodesign Institute, Arizona State University, PO Box 8724501, Tempe, AZ  
21 85287, USA.

22 **Abstract**

23 **Background:** The eastern fence lizard (*Sceloporus undulatus*) has been a model  
24 species for ecological and evolutionary research. Genomic and transcriptomic  
25 resources for this species would promote investigation of genetic mechanisms  
26 that underpin plastic responses to environmental stress, such as climate  
27 warming. Moreover, such resources would aid comparative studies of complex  
28 traits at the molecular level, such as the transition from oviparous to viviparous  
29 reproduction, which happened at least four times within *Sceloporus*.

30 **Findings:** A *de novo* transcriptome assembly for *Sceloporus undulatus*,  
31 Sund\_v1.0, was generated using over 179 million Illumina reads obtained from  
32 three tissues (whole brain, skeletal muscle, and embryo) as well as previously  
33 reported liver sequences. The Sund\_v1.0 assembly had an average contig length  
34 of 782 nucleotides and an E90N50 statistic of 2,550 nucleotides. Comparing *S.*  
35 *undulatus* transcripts with the benchmarking universal single-copy orthologs  
36 (BUSCO) for tetrapod species yielded 97.2% gene representation. A total of  
37 13,422 protein-coding orthologs were identified in comparison to the genome of  
38 the green anole lizard, *Anolis carolinensis*, which is the closest related species  
39 with genomic data available.

40 **Conclusions:** The multi-tissue transcriptome of *S. undulatus* is the first for a  
41 member of the family Phrynosomatidae, offering an important resource to  
42 advance studies of adaptation in this species and genomic research in reptiles.

43

44 **Keywords:** *Sceloporus undulatus*, eastern fence lizard, Phrynosomatidae, RNA-  
45 Seq, transcriptome, assembly, annotation.

46

## 47 **Data description**

### 48 **Context**

49 Eastern fence lizards belong to a clade, the *Sceloporus undulatus* complex,  
50 which spans much of the United States and northern Mexico [1]. Because these  
51 lizards occupy a wide range of habitats and environmental conditions, *S.*  
52 *undulatus* has been a good model for studies of organismal ecology [2–4],  
53 population dynamics [5,6], and local adaptation [7–9]. In particular, embryos of  
54 oviparous *S. undulatus* are subjected to oscillations in nest temperature that are  
55 known to affect development [10–13], which could potentially be compensated for  
56 by egg-laying behavior in adult females [14,15]. Embryos of this species have a  
57 threshold for thermal tolerance at high temperatures and are thus susceptible to  
58 potential warming due to climate change [11,16]. Other species in the genus  
59 *Sceloporus* evolved either prolonged or complete retention of eggs in response to  
60 cold environments. In fact, viviparity has evolved in association with cooler  
61 climates at least four times within *Sceloporus* and another two times in the  
62 Phrynosomatidae [17], along with numerous physiological and morphological  
63 adaptations expected to accompany this convergent trait. Specifically, a  
64 congeneric species (*S. jarrovi*) displays specialized features in the placenta,  
65 although relying mostly on yolk nutrients during development (lecithotrophy)

66 [18,19]. A comparative study of gene expression among *Sceloporus* species that  
67 differ in parity mode (oviparous vs. viviparous) would allow testing for  
68 convergence with the pregnant-specific gene expression profile described for  
69 viviparous lizard species from family Scincidae, whose development depend  
70 mostly on nutrients from the mother (matrotrophy) [20]. To begin to identify the  
71 genes for molecular studies of these processes, we have sequenced and  
72 annotated a *de novo* multi-tissue transcriptome for *Sceloporus undulatus*.

73

## 74 **Methods**

### 75 *a) Sampling*

76 Gravid females of *Sceloporus undulatus* were collected in Edgefield County,  
77 South Carolina (33.7°N, 82.0°W) and transported to Arizona State University.  
78 These animals were maintained under conditions described in previous  
79 publications [21,22], which were approved by the Institutional Animal Care and  
80 Use Committee (Protocol #14-1338R). Approximately two days after laying eggs,  
81 each lizard was euthanized by injecting sodium pentobarbital into the coelomic  
82 cavity. The whole brain and skeletal muscle samples were removed and placed  
83 in RNA-lysis buffer (mirVana miRNA Isolation Kit, Ambion) and flash-frozen.  
84 Additionally, three early-stage embryos from each clutch were dissected, pooled  
85 together, and homogenized in RNA-lysis buffer using the same protocol.

### 86 *b) Sequencing*

87 Total RNA was isolated from three tissue samples (whole brain, skeletal muscle  
88 and embryos) from each individual using the mirVana miRNA Isolation Kit  
89 (Ambion) protocol. Samples were checked for quality on a 2100 Bioanalyzer  
90 (Agilent). One sample from each tissue was selected for RNA-Seq based on the  
91 highest RIN, with a cutoff of 8.0. For each selected sample, 3 µg of total RNA  
92 was sent to the University of Arizona Genetics Core (Tucson, AZ) for library  
93 preparation and with TruSeq v3 chemistry for a standard insert size. RNA  
94 samples were multiplexed and sequenced using an Illumina HiSeq 2000 to  
95 generate 100-bp paired-end reads. Publicly available raw Illumina RNA-Seq  
96 reads from *S. undulatus* liver [23] were added to our dataset. After removing  
97 adaptors, raw reads from the four tissues were evaluated using FastQC  
98 (<http://www.bioinformatics.babraham.ac.uk/projects/fastqc/>, v-0.11.5) and  
99 trimmed using Trimmomatic (v-0.32, [24]), filtering for quality score ( $\geq Q20$ ) and  
100 using HEADCROP:9 to minimize nucleotide bias. This procedure yielded  
101 179,374,469 quality-filtered reads. **Table 1** summarizes read-pair counts from  
102 whole brain, skeletal muscle, whole embryos, and liver.

### 103 *c) Assembly and annotation*

104 All trimmed reads were pooled and assembled *de novo* using Trinity (v-2.2.0,  
105 default k-mer size of 25 [25]), which is an efficient transcriptome assembly  
106 method for non-model species without a reference genome available [26]. The  
107 most comprehensive transcriptome, obtained using reads from four tissues,  
108 consists of 547,370 contigs with an average length of 781.5 nucleotides (**Table**

109 **2)**—shorter than other assemblies because of the range of contig sizes that  
110 varied among datasets (1, 3 and 4 tissues; **Table S1, Fig. S1**). The N50 of the  
111 most highly expressed transcripts that represent 90% of the total normalized  
112 expression data (E90N50) was highest in the assembly based on four tissues,  
113 hereafter referred to as Sund\_v1.0 (**Table 2**). A subset of contigs containing the  
114 longest open reading frames (ORFs), representing 123,323 transcripts, was  
115 extracted from the Sund\_v1.0 assembly using TransDecoder (v-3.0.0,  
116 <http://transdecoder.github.io>) with homology searches against the databases  
117 UniProtKB/SwissProt [27] and PFAM [28]. The transcriptome obtained was  
118 annotated using Trinotate (v-3.0, <http://trinotate.github.io>), which involved  
119 searching against multiple databases (as UniProtKB/SwissProt, PFAM, signalP,  
120 GO) to identify sequence homology and protein domains, as well as to predict  
121 signaling peptides. **Table 3** summarizes the annotation results.

122

### 123 ***Data validation and quality control***

124 Trimmed reads were aligned back to the assembled contigs using Bowtie2 (v-  
125 2.2.6 [29]). From the 176,086,787 reads that aligned, 97% represented proper  
126 pairs (**Table S2**), indicating good read representation in the Sund\_v1.0  
127 assembly. To assess quality and completeness of the assemblies, we first  
128 compared the Sund\_v1.0 transcripts with the BUSCO profile for Tetrapoda  
129 (BUSCO v-2.0 [30]), which has BLAST+ (v-2.2.31 [31]) and HMMER (v-3.1b2

130 [32]) as dependencies. This procedure revealed that the Sund\_v1.0 assembly  
131 captured 97.1% of the expected orthologs, a result comparable to the 97.8%  
132 obtained for *Anolis carolinensis* transcriptome using 14 tissues [33] (**Table 4**).  
133 Next, nucleotide sequences of Sund\_v1.0 transcripts with the longest ORFs were  
134 compared to the protein set of *Anolis carolinensis* (AnoCar2.0, Ensembl) using  
135 BLASTX (evalue=1e-20, max\_target\_seqs=1). This comparison showed that  
136 11,223 transcripts of *S. undulatus* have nearly full-length (>80%) alignment  
137 coverage with *A. carolinensis* proteins (**Table S3**). Predicted proteins of *S.*  
138 *undulatus* were also used to identify 13,422 one-to-one orthologs with proteins of  
139 *A. carolinensis* through reciprocal BLAST (evalue=1e-6, max\_target\_seqs=1).

140

#### 141 **Availability of supporting data**

142 Novel RNA-Seq data for *Sceloporus undulatus* samples are available under the  
143 NCBI accession identifiers listed in Table 1, and are associated with BioProject  
144 PRJNA371829. RNA-Seq data for the liver sample [23] were downloaded from  
145 NCBI from BioProject PRJNA183121, Run SRR629640. Datasets referring to the  
146 assembled and annotated transcriptome are available for download at Harvard  
147 Dataverse (doi:10.7910/DVN/EGRBCT).

148

149

150

151 *List of abbreviations*

152 BLAST: Basic local alignment search tool; BUSCO: Benchmarking Universal  
153 Single-Copy Orthologs; GO: Gene Ontology; National Center for Biotechnology  
154 Information NCBI; ORFs: open reading frames; RIN: RNA integrity number.

155

156 **Competing interests**

157 The authors declare that they have no competing interests.

158

159 **Funding**

160 This work was funded by a Grant for Post Doctoral Interdisciplinary Research in  
161 the Life Sciences from the School of Life Sciences at Arizona State University  
162 awarded to MT and OL, funding from the College of Liberal Arts and Sciences at  
163 Arizona State University to KK, and a post-doctoral fellowship from the Conselho  
164 Nacional de Desenvolvimento Científico e Tecnológico (CNPq; 201369/2014-1)  
165 awarded to MBG.

166

167 **Authors' contributions**

168 MBG performed transcript assemblies and bioinformatics analyses; JJR  
169 performed transcript assemblies and bioinformatics analyses; MAT, OL, MJA and  
170 KK conceived the study; MAT and KK supervised bioinformatics analyses; MJA  
171 and OL provided samples. MBG drafted the manuscript, with edits from MT, KK,  
172 and MJA. All authors read and approved the final version.



173

174 **Acknowledgements**

175 We thank Michael W. Sears and Colton D. Smith for collecting specimens and  
176 John Cornelius, Greer Dolby, Shawn Rupp, Timothy Webster and Cindy Xu for  
177 helpful discussions.

178

179 **References**

- 180 1. Leaché AD. Species tree discordance traces to phylogeographic clade boundaries in  
181 north American Fence lizards (*Sceloporus*). *Syst. Biol.* 2009;58:547–59.
- 182 2. Angilletta MJ. Thermal and physiological constraints on energy assimilation in a  
183 widespread lizard (*Sceloporus undulatus*). *Ecology.* 2001;82:3044–56.
- 184 3. Adolph SC, Porter WP. Temperature, activity, and lizard life histories. *Am. Nat.*  
185 1993;142:273–95.
- 186 4. Niewiarowski PH. Energy budgets, growth rates, and thermal constraints: toward an  
187 integrative approach to the study of life-history variation. *Am. Nat.* 2001;157:421–33.
- 188 5. Tinkle DW, Ballinger RE. *Sceloporus undulatus*: A study of the intraspecific  
189 comparative demography of a lizard. *Ecology.* 1972;53:570–84.
- 190 6. Niewiarowski PH. Understanding geographic life history variation in lizards. In: Pianka  
191 ER, Vitt LJ, editors. *Lizard Ecol. Hist. Exp. Perspect.* Princeton: Princeton University  
192 Press; 1994. p. 31–49.
- 193 7. Oufiero CE, Angilletta Michael J J. Convergent evolution of embryonic growth and  
194 development in the eastern fence lizard (*Sceloporous undulatus*). *Evolution (N. Y.)*.  
195 2006;60:1066–75.
- 196 8. Angilletta MJ, Niewiarowski PH, Dunham AE, Leache AD, Porter WP. Bergmann’s

- 197 clines in ectotherms: Illustrating a life-history perspective with sceloporine lizards. Am.  
198 Nat. 2004;164:E168–83.
- 199 9. Angilletta MJ, Oufiero CE, Leaché AD. Direct and indirect effects of environmental  
200 temperature on the evolution of reproductive strategies: an information theoretic  
201 approach. Am. Nat. 2006;168:E123–35.
- 202 10. Levy O, Buckley LB, Keitt TH, Smith CD, Boateng KO, Kumar DS, et al. Resolving  
203 the life cycle alters expected impacts of climate change. Proc. R. Soc. B Biol. Sci.  
204 2015;282.
- 205 11. Angilletta MJ, Zelic MH, Adrian GJ, Hurliman AM, Smith CD. Heat tolerance during  
206 embryonic development has not diverged among populations of a widespread species  
207 (*Sceloporus undulatus*). Conserv. Physiol. 2013;1:1–9.
- 208 12. Parker SL, Andrews RM. Incubation temperature and phenotypic traits of *Sceloporus*  
209 *undulatus*: Implications for the northern limits of distribution. Oecologia. 2007;151:218–  
210 31.
- 211 13. Angilletta MJ, Winters RS, Dunham AE. Thermal effects on the energetics of lizard  
212 embryos: Implications for hatchling phenotypes. Ecology. 2000;81:2957–68.
- 213 14. Angilletta MJ, Hill T, Robson MA. Is physiological performance optimized by  
214 thermoregulatory behavior?: A case study of the eastern fence lizard, *Sceloporus*  
215 *undulatus*. J. Therm. Biol. 2002;27:199–204.
- 216 15. Buckley LB, Ehrenberger JC, Angilletta MJ. Thermoregulatory behaviour limits local  
217 adaptation of thermal niches and confers sensitivity to climate change. Funct. Ecol.  
218 2015;29:1038–47.
- 219 16. Telemeco RS, Fletcher B, Levy O, Riley A, Rodriguez-Sanchez Y, Smith C, et al.  
220 Lizards fail to plastically adjust nesting behavior or thermal tolerance as needed to buffer  
221 populations from climate warming. Glob. Chang. Biol. 2016;1–10.

- 222 17. Lambert SM, Wiens JJ. Evolution of viviparity: A phylogenetic test of the cold-climate  
223 hypothesis in phrynosomatid lizards. *Evolution* (N. Y). 2013;67:2614–30.
- 224 18. Blackburn DG, Gavelis GS, Anderson KE, Johnson AR, Dunlap KD. Placental  
225 specializations of the mountain spiny lizard *Sceloporus jarrovi*. *J. Morphol.*  
226 2010;271:1153–75.
- 227 19. Anderson KE, Blackburn DG, Dunlap KD. Scanning electron microscopy of the  
228 placental interface in the viviparous lizard *Sceloporus jarrovi* (Squamata:  
229 Phrynosomatidae). *J. Morphol.* 2011;272:465–84.
- 230 20. Griffith OW, Brandley MC, Belov K, Thompson MB. Reptile pregnancy is  
231 underpinned by complex changes in uterine gene expression: A comparative analysis of  
232 the uterine transcriptome in viviparous and oviparous lizards. *Genome Biol. Evol.*  
233 2016;8:3226–39.
- 234 21. Fisher RE, Geiger LA, Stroik LK, Hutchins ED, George RM, Denardo DF, et al. A  
235 histological comparison of the original and regenerated tail in the green anole, *Anolis*  
236 *carolinensis*. *Anat. Rec. (Hoboken)*. 2012;295:1609–19.
- 237 22. Ritzman TB, Stroik LK, Julik E, Hutchins ED, Lasku E, Denardo DF, et al. The gross  
238 anatomy of the original and regenerated tail in the green anole (*Anolis carolinensis*).  
239 *Anat. Rec. (Hoboken)*. 2012;295:1596–608.
- 240 23. McGaugh SE, Bronikowski AM, Kuo C-H, Reding DM, Addis EA, Flagel LE, et al.  
241 Rapid molecular evolution across amniotes of the IIS/TOR network. *Proc. Natl. Acad.*  
242 *Sci.* 2015;112:7055–60.
- 243 24. Bolger AM, Lohse M, Usadel B. Trimmomatic: A flexible trimmer for Illumina  
244 sequence data. *Bioinformatics*. 2014;30:2114–20.
- 245 25. Grabherr MG, Haas BJ, Yassour M, Levin JZ, Thompson DA, Amit I, et al. Trinity:  
246 reconstructing a full-length transcriptome without a genome from RNA-Seq data. *Nat.*

247 Biotechnol. 2013;29:644–52.

248 26. Huang X, Chen X-G, Armbruster PA. Comparative performance of transcriptome  
249 assembly methods for non-model organisms. BMC Genomics. BMC Genomics;  
250 2016;17:523.

251 27. The UniProt Consortium. UniProt: the universal protein knowledgebase. Nucleic  
252 Acids Res. 2017;45:158–69.

253 28. Finn RD, Coggill P, Eberhardt RY, Eddy SR, Mistry J, Mitchell AL, et al. The Pfam  
254 protein families database: towards a more sustainable future. Nucleic Acids Res.  
255 2016;44:279–85.

256 29. Langmead B, Salzberg SL. Fast gapped-read alignment with Bowtie 2. Nat Methods.  
257 2012;9:357–9.

258 30. Simão FA, Waterhouse RM, Ioannidis P, Kriventseva E V., Zdobnov EM. BUSCO:  
259 Assessing genome assembly and annotation completeness with single-copy orthologs.  
260 Bioinformatics. 2015;31:3210–2.

261 31. Camacho C, Coulouris G, Avagyan V, Ma N, Papadopoulos J, Bealer K, et al.  
262 BLAST+: architecture and applications. BMC Bioinformatics. 2009;10:1–9.

263 32. Eddy SR. A new generation of homology search tools based on probabilistic  
264 inference. Genome Inform. 2009;23:205–11.

265 33. Eckalbar WL, Hutchins ED, Markov GJ, Allen AN, Corneveaux JJ, Lindblad-Toh K, et  
266 al. Genome reannotation of the lizard *Anolis carolinensis* based on 14 adult and  
267 embryonic deep transcriptomes. BMC Genomics. 2013;14:49.

268

269

270

271 **Figures and tables**

272

273 **Table 1** Number of pairs and accessions numbers for *Sceloporus undulatus*

274 sequence reads.

| <b>Tissue</b>               | <b>Number of read pairs</b> | <b>Accession numbers</b> |
|-----------------------------|-----------------------------|--------------------------|
| <i>This study</i>           |                             |                          |
| Whole Brain                 | 51,537,265                  | SAMN06312741             |
| Embryo                      | 49,112,293                  | SAMN06312742             |
| Skeletal muscle             | 42,922,488                  | SAMN06312743             |
| <i>McGaugh et al., 2015</i> |                             |                          |
| Liver                       | 35,802,423                  | SRR629640                |
| Total                       | 179,374,469                 | —                        |

275

276

277

**Table 2** Statistics for the *de novo* assembly of *Sceloporus undulatus* transcriptome (Sund\_v1.0).

| <b>Assembly</b>                     | <b>1 tissue [23]</b> | <b>3 tissues</b> | <b>4 tissues<br/>(Sund_v1.0)</b> |
|-------------------------------------|----------------------|------------------|----------------------------------|
| Total of Trinity transcript contigs | 158,323              | 492,249          | 547,370                          |
| Total of Trinity 'genes'            | 138,031              | 422,687          | 467,658                          |
| GC%                                 | 43.8                 | 42.9             | 42.8                             |
| Contig N50 (bp)                     | 1,720                | 1,648            | 1,438                            |
| Contig E90N50 (bp)                  | 2,254                | 2,640            | 2,550                            |
| Average contig length (bp)          | 833.0                | 822.4            | 781.5                            |
| Transcripts with the longest        | 86,630               | 212,172          | 217,756                          |
| ORFs                                | (54.7%)              | (43.1%)          | (39.8%)                          |

278

279 The different assemblies used data from a previous study (1 tissue, liver [23]),  
280 data from this study (3 tissues:: whole brain, skeletal muscle, embryos), and the  
281 two datasets combined (4 tissues, or Sund\_v1.0).

282

283

284 **Table 3** Annotation summary of *Sceloporus undulatus de novo* transcriptome

285 assembly (Sund\_v1.0).

---

| <b>Annotation of the Sund_v1.0 assembly</b> |                 |
|---------------------------------------------|-----------------|
| Annotated genes                             | 467,658         |
| Annotated transcript isoforms               | 547,370         |
| Annotated isoforms/gene                     | 1.17            |
| Transcripts with Swiss-Prot annotation      | (71,944)        |
| Transcripts with PFAM annotation            | 51,018 (46,432) |
| Transcripts with KEGG annotation            | 65,694 (21,520) |
| Transcripts with GO annotation              | 73,936 (66,554) |

---

286

287 Unique annotation numbers are indicated by parentheses.

288 **Table 4** BUSCO results for the transcriptomes of *Sceloporus undulatus* and  
 289 *Anolis carolinensis*.

|                  | <i>Sceloporus undulatus</i> |            |                          | <i>Anolis carolinensis</i> |
|------------------|-----------------------------|------------|--------------------------|----------------------------|
|                  | 1 tissue                    | 3 tissues  | 4 tissues<br>(Sund_v1.0) | 14 tissues                 |
| Complete genes   | 72.5%                       | 91.7%      | 92.3%                    | 96.7%                      |
| Duplicated genes | 25%                         | 43.8%      | 43.9%                    | 37.9%                      |
| Fragmented genes | 9.2%                        | 4.8%       | 4.8%                     | 1.1%                       |
| Missing genes    | 18.3%                       | 3.5%       | 2.9%                     | 2.2%                       |
| Reference        | McGaugh et al, 2015 [23]    | This study | This study               | Eckalbar et al, 2013 [33]  |

290

291 *For S. undulatus*, the Sund\_v1.0 assembly includes 4 tissues, specifically 3  
 292 tissues from this study (whole brain, skeletal muscle and embryos) and 1  
 293 previously reported tissue (liver [23]). *For A. carolinensis*, transcriptomes  
 294 included adrenal gland, brain, dewlap skin, embryos, and pooled samples, heart,  
 295 liver, lung, original tail, ovary, regenerating tail tip, regenerating tail base, and  
 296 skeletal muscle [18].

297



298 **Supporting information – Tables**

299

300 **Table S1** Contig length statistics for *Sceloporus undulatus de novo* assemblies.

|                          | <b>1 tissue</b> | <b>3 tissues</b> | <b>4 tissues</b> |
|--------------------------|-----------------|------------------|------------------|
| Minimum length           | 201.0           | 201.0            | 201.0            |
| 1 <sup>st</sup> Quartile | 266.0           | 266.0            | 266.0            |
| Median                   | 382.0           | 377.0            | 375.0            |
| Mean                     | 829.9           | 822.4            | 781.0            |
| 3 <sup>rd</sup> Quartile | 808.0           | 732.0            | 711.0            |
| Maximum length           | 16,776.0        | 30,410.0         | 30,258.0         |

301

302 The Sund\_v1.0 assembly includes 4 tissues, specifically 3 tissues sequenced in  
303 this study (whole brain, skeletal muscle and embryos) and 1 previously reported  
304 tissue (liver [23]).

305

306 **Table S2** Reads mapped to *Sceloporus undulatus de novo* Sund\_v1.0 assembly.

| <b>Read classification</b> | <b>Counts</b> | <b>Percentage of mapped reads</b> |
|----------------------------|---------------|-----------------------------------|
| Proper pairing             | 170,981,981   | 97.10%                            |
| Left read only             | 3,778,790     | 2.15%                             |
| Right read only            | 1,015,874     | 0.58%                             |
| Improper pairing           | 310,142       | 0.18%                             |

307 **Table S3** Representation of full-length reconstructed protein-coding genes in  
308 *Sceloporus undulatus de novo* Sund\_v1.0 transcriptome assembly, using the  
309 protein set of *Anolis carolinensis* (AnoCar2.0, Ensembl) as a reference.

| Alignment |        | Cumulative |
|-----------|--------|------------|
| coverage  | Counts | counts     |
| 100%      | 9,874  | 9,874      |
| 90%       | 1,349  | 11,223     |
| 80%       | 799    | 12,022     |
| 70%       | 757    | 12,779     |
| 60%       | 725    | 13,504     |
| 50%       | 577    | 14,081     |
| 40%       | 463    | 14,544     |
| 30%       | 455    | 14,999     |
| 20%       | 358    | 15,357     |
| 10%       | 97     | 15,454     |

310

### 311 **Supporting information – Figure**

312 **Figure S1** Contig sizes for different *Sceloporus undulatus* assemblies.

313 Assemblies used **(A)** the previously published single tissue transcriptome (liver  
314 [23]), **(B)** transcriptomes from the 3 tissues sequenced in this study (brain,  
315 skeletal muscle and embryos), and **(C)** the combined data set of 4 tissues ([23]  
316 and this study).

**A**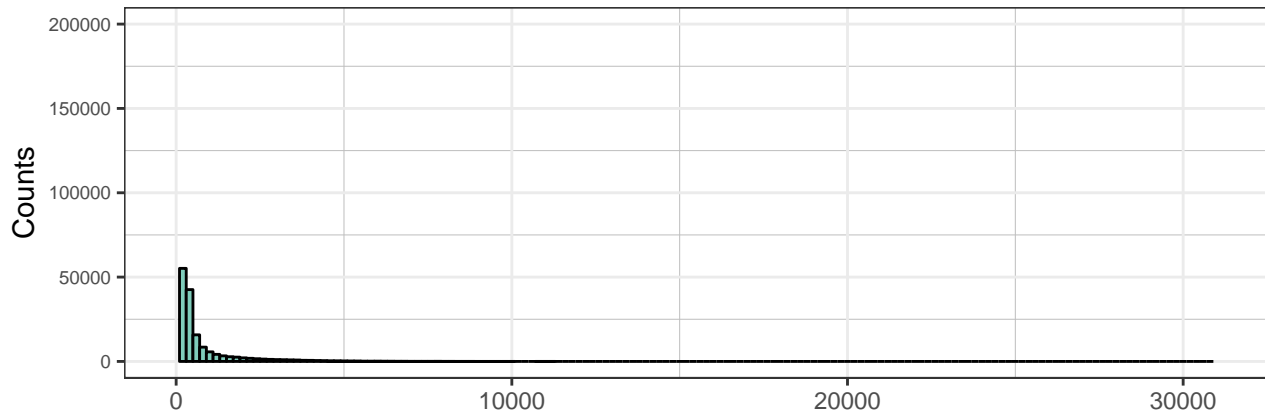**B**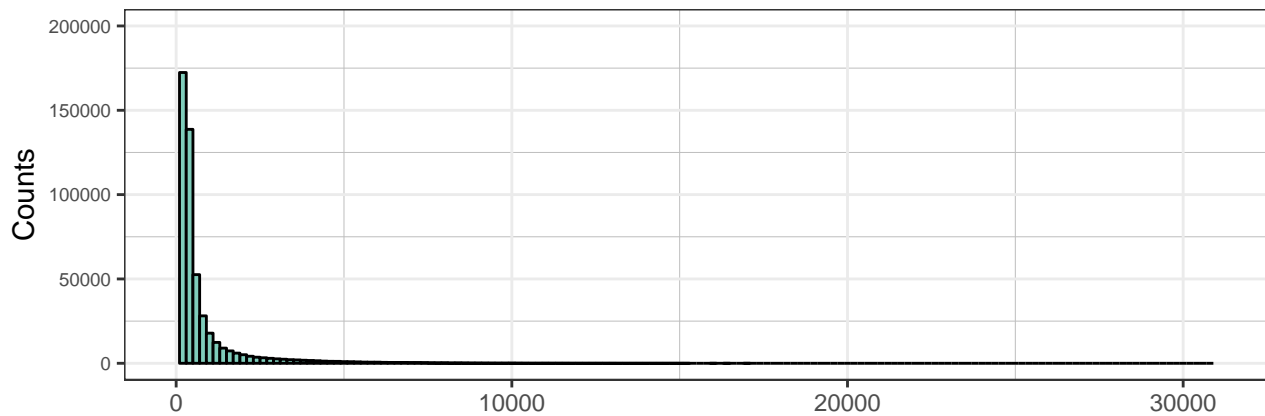**C**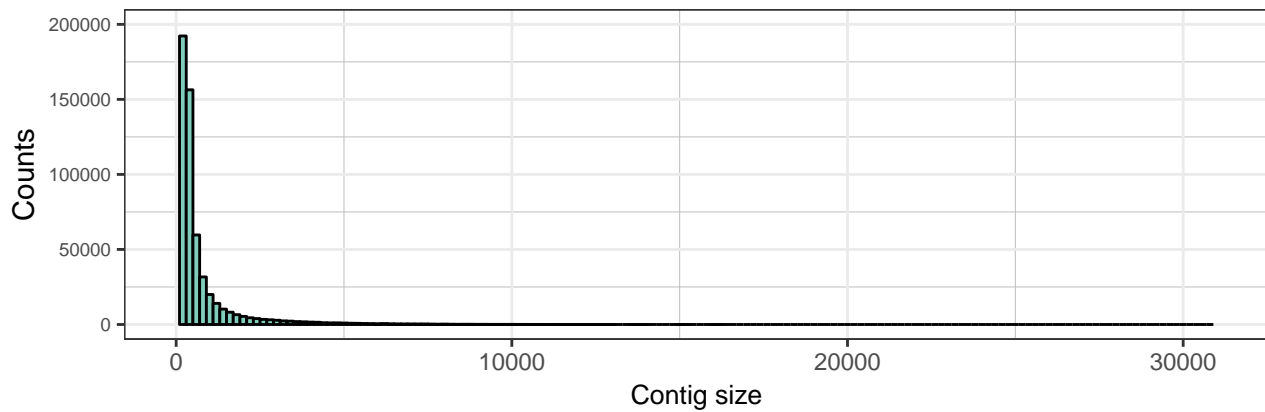

Source: https://www.biorxiv.org/content/10.1101/136069v3.full.pdf
